# Supplementary material
Source: MDPI journal article supplement (https://www.mdpi.com/2073-4441/15/4/802)
Supplement: s1 [file s1]

Table S1. The water parameters, major ion compositions, SAR, Na%, RSC, NICB of Tongzi River.

| Sample | pH   | DO    | EC    | T     | Na <sup>+</sup> | K <sup>+</sup> | Mg <sup>2+</sup> | Ca <sup>2+</sup> | Cl <sup>-</sup> | NO <sub>3</sub> <sup>-</sup> | SO <sub>4</sub> <sup>2-</sup> | HCO <sub>3</sub> <sup>-</sup> | F <sup>-</sup> | NH <sub>4</sub> <sup>+</sup> | SAR  | Na     | RSC  | NICB   |
|--------|------|-------|-------|-------|-----------------|----------------|------------------|------------------|-----------------|------------------------------|-------------------------------|-------------------------------|----------------|------------------------------|------|--------|------|--------|
|        |      | mg/L  | µs/cm | °C    | mmol/L          |                |                  |                  |                 | mg/L                         |                               |                               |                | %                            |      | %      |      |        |
| G1     | 9.16 | 9.56  | 330   | 24.55 | 0.17            | 0.06           | 0.33             | 1.23             | 0.06            | 0.08                         | 0.52                          | 2.07                          | 0.006          | 0.22                         | 0.19 | 9.50%  | 0.51 | 2.99%  |
| G2     | 9.23 | 9.52  | 386.5 | 21.01 | 0.21            | 0.05           | 0.31             | 1.55             | 0.08            | 0.14                         | 0.68                          | 2.42                          | 0.007          | 0.14                         | 0.22 | 9.91%  | 0.56 | -0.50% |
| G3     | 9.03 | 8.2   | 514   | 23.67 | 0.35            | 0.08           | 0.53             | 1.93             | 0.26            | 0.21                         | 1.01                          | 2.89                          | 0.009          | 0.19                         | 0.32 | 12.11% | 0.43 | -0.56% |
| G4     | 8.97 | 8.54  | 404.9 | 20.64 | 0.25            | 0.06           | 0.34             | 1.58             | 0.12            | 0.16                         | 0.72                          | 2.51                          | 0.008          | 0.53                         | 0.26 | 11.21% | 0.59 | -1.93% |
| G5     | 8.82 | 8.32  | 403.9 | 20.35 | 0.23            | 0.06           | 0.34             | 1.6              | 0.12            | 0.15                         | 0.72                          | 2.46                          | 0.009          | 0.16                         | 0.23 | 10.31% | 0.52 | 0.00%  |
| G6     | 9.2  | 8.65  | 447.7 | 23.05 | 0.3             | 0.07           | 0.41             | 1.73             | 0.17            | 0.2                          | 0.85                          | 2.6                           | 0.009          | 0.09                         | 0.29 | 11.95% | 0.46 | -0.43% |
| G7     | 9.22 | 8.56  | 448.7 | 23.62 | 0.29            | 0.07           | 0.44             | 1.72             | 0.17            | 0.21                         | 0.86                          | 2.67                          | 0.010          | 0.14                         | 0.28 | 11.51% | 0.51 | -1.92% |
| G8     | 9.16 | 8.67  | 452.6 | 23.42 | 0.25            | 0.06           | 0.5              | 1.7              | 0.15            | 0.19                         | 0.89                          | 2.62                          | 0.009          | 0.18                         | 0.24 | 9.96%  | 0.42 | -0.64% |
| G9     | 9.1  | 12.15 | 403.1 | 28.34 | 0.19            | 0.05           | 0.51             | 1.41             | 0.13            | 0.23                         | 0.8                           | 2.09                          | 0.007          | 0.1                          | 0.19 | 8.80%  | 0.17 | 0.74%  |
| G10    | 9.34 | 12.27 | 361.7 | 28.97 | 0.15            | 0.04           | 0.4              | 1.3              | 0.13            | 0.18                         | 0.63                          | 2.01                          | 0.006          | 0.08                         | 0.16 | 7.94%  | 0.31 | 0.28%  |
| G11    | 9.32 | 10.81 | 399.5 | 28.56 | 0.14            | 0.05           | 0.5              | 1.18             | 0.11            | 0.18                         | 0.53                          | 2.14                          | 0.007          | 0.08                         | 0.15 | 7.49%  | 0.46 | 1.69%  |
| G12    | 9.03 | 1.24  | 412   | 22.78 | 0.16            | 0.05           | 0.47             | 1.54             | 0.12            | 0.25                         | 0.68                          | 2.47                          | 0.009          | 0.17                         | 0.16 | 7.21%  | 0.46 | 0.71%  |
| G13    | 9.06 | 2.63  | 421.4 | 23.05 | 0.17            | 0.05           | 0.48             | 1.64             | 0.13            | 0.25                         | 0.71                          | 2.51                          | 0.007          | 0.1                          | 0.17 | 7.26%  | 0.39 | 3.36%  |
| Z1     | 9.1  | 9.53  | 500.3 | 23.57 | 0.4             | 0.07           | 0.63             | 1.76             | 0.31            | 0.18                         | 0.99                          | 2.84                          | 0.009          | 0.25                         | 0.37 | 13.99% | 0.45 | -1.14% |
| Z2     | 9.03 | 9.11  | 494.9 | 23.35 | 0.32            | 0.07           | 0.54             | 1.85             | 0.25            | 0.2                          | 0.95                          | 2.86                          | 0.009          | 0.15                         | 0.29 | 11.51% | 0.47 | -0.77% |
| Z3     | 8.54 | 4.66  | 622.3 | 23.5  | 0.58            | 0.16           | 0.32             | 2.44             | 0.51            | 0.47                         | 1.03                          | 3.44                          | 0.011          | 2.65                         | 0.49 | 16.57% | 0.68 | -3.51% |
| Z4     | 9.22 | 8.37  | 421.9 | 24.74 | 0.06            | 0.04           | 1.08             | 1.16             | 0.09            | 0.16                         | 0.37                          | 3.5                           | 0.004          | 0.18                         | 0.06 | 2.56%  | 1.26 | 1.97%  |
| Z5     | 9.36 | 9     | 461.1 | 25.57 | 0.26            | 0.06           | 0.57             | 1.66             | 0.19            | 0.19                         | 1.03                          | 2.44                          | 0.009          | 0.35                         | 0.25 | 10.20% | 0.21 | -2.09% |
| Z6     | 9.16 | 9.14  | 454   | 22.66 | 0.13            | 0.04           | 1.09             | 1.3              | 0.08            | 0.13                         | 0.86                          | 2.86                          | 0.006          | 0.43                         | 0.12 | 5.08%  | 0.47 | 3.23%  |
| Z7     | 9.23 | 9.2   | 396.3 | 20.9  | 0.09            | 0.03           | 0.85             | 1.24             | 0.05            | 0.14                         | 0.6                           | 2.84                          | 0.004          | 0.01                         | 0.09 | 4.07%  | 0.75 | 1.63%  |

|     |      |       |       |       |      |      |      |      |      |      |      |      |       |      |      |       |      |        |
|-----|------|-------|-------|-------|------|------|------|------|------|------|------|------|-------|------|------|-------|------|--------|
| Z8  | 9.12 | 8.84  | 465.6 | 22.62 | 0.15 | 0.04 | 0.66 | 1.93 | 0.1  | 0.3  | 1.18 | 2.75 | 0.009 | 0.3  | 0.13 | 5.40% | 0.16 | -2.61% |
| Z9  | 9.12 | 9.83  | 476.3 | 21.9  | 0.1  | 0.04 | 1.02 | 1.52 | 0.08 | 0.19 | 0.71 | 3.66 | 0.007 | 0.24 | 0.09 | 3.73% | 1.12 | -2.49% |
| Z10 | 9.12 | 9.29  | 372.8 | 20.1  | 0.07 | 0.02 | 0.77 | 1.22 | 0.03 | 0.11 | 0.52 | 2.92 | 0.004 | 0.21 | 0.07 | 3.37% | 0.93 | -0.74% |
| Z11 | 9.12 | 9.05  | 424.1 | 20.39 | 0.14 | 0.04 | 0.38 | 1.79 | 0.05 | 0.18 | 0.54 | 3.04 | 0.006 | 0.08 | 0.13 | 5.96% | 0.87 | 3.76%  |
| Z12 | 9.13 | 9.15  | 424.5 | 20.16 | 0.13 | 0.04 | 0.43 | 1.74 | 0.06 | 0.2  | 0.56 | 3.1  | 0.006 | 0.12 | 0.12 | 5.56% | 0.93 | 0.67%  |
| Z13 | 9.29 | 13.01 | 396.3 | 28.5  | 0.18 | 0.05 | 0.5  | 1.38 | 0.13 | 0.23 | 0.81 | 2.09 | 0.007 | 0.09 | 0.19 | 8.53% | 0.21 | -2.01% |
| Z14 | 9.22 | 10.15 | 407.5 | 19.98 | 0.1  | 0.04 | 0.53 | 1.47 | 0.07 | 0.24 | 0.6  | 2.69 | 0.006 | 0.14 | 0.10 | 4.67% | 0.69 | -1.45% |
| Z15 | 9.14 | 8.81  | 449.1 | 20.61 | 0.12 | 0.04 | 0.61 | 1.68 | 0.11 | 0.34 | 0.79 | 2.7  | 0.005 | 0.06 | 0.11 | 4.90% | 0.41 | 0.21%  |
| Z16 | 8.93 | 10.29 | 401   | 28.76 | 0.18 | 0.05 | 0.43 | 1.5  | 0.15 | 0.18 | 0.74 | 2.3  | 0.007 | 0.04 | 0.18 | 8.33% | 0.37 | -0.49% |
| Z17 | 9.36 | 10.54 | 376.3 | 28.63 | 0.13 | 0.04 | 0.62 | 1.21 | 0.11 | 0.19 | 0.51 | 2.46 | 0.007 | 0.12 | 0.14 | 6.50% | 0.63 | 1.31%  |
| Z18 | 9.22 | 9.05  | 584.1 | 23.01 | 0.28 | 0.07 | 0.86 | 2.15 | 0.28 | 0.28 | 1.18 | 3.38 | 0.011 | 0.06 | 0.23 | 8.33% | 0.37 | 1.10%  |

---
